# Supplementary material for: Dysfunction of adaptive immunity is related to severity of COVID-19: a retrospective study
Source: PubMed Central journal article supplement — Ther Adv Respir Dis. 2020 Jul 20;14:1753466620942129. doi: 10.1177/1753466620942129 (PMC7372623; doi:10.1177/1753466620942129), 2020-07-20
Supplement: Author_Response_2.pdf [file Author_Response_2.pdf]

## Author Response 2

Reviewer: 1

Comments to the Author

Add to methods:

- Complete cell counts and the absolute count for platelet count, neutrophils, monocytes, lymphocytes were retrieved separately for the calculation of inflammatory index calculation of neutrophil-to-lymphocyte ratio (NLR)
- Few details about all reagents used, the company providing the kit and country method in short or add a reference
- Few details about flow cytometer reagent used, lymphocyte markers for T and B cells. The company providing the kit and country method in short or add a reference

Answer:

1. Thank you for pointing out the right location for adding the information of blood routine tests. This retrospective study collected the laboratory results of the patients which were tested in the clinical lab of the hospitals. As a result, we did not add the detailed protocol in the methods at the beginning. We are truly sorry for missing this part in the methods. In the revised manuscript, we added the protocol of blood routine tests. Also, the absolute count of platelets was listed in Table 2. Moreover, the counts of neutrophils, monocytes and lymphocytes at admission were listed in Table 3, and the corresponding counts of these cells at discharge were listed in Table 4. TLC represents total lymphocyte count. Thank you again for reminding us.

2. In this study, blood samples were analyzed by blood routine tests and flow cytometry. The reagents used and the specific methods were listed in "Blood routine tests" and "Flow cytometry of peripheral blood" in methods. Thank you for the advice!

3. The reagents of flow cytometry were purchased from BD Biosciences. We only measured T lymphocyte cells and the markers for lymphocytes were listed in "Flow cytometry of peripheral blood" of methods. The specific protocol can be referred to another study which was marked as reference 9.(Falay, Senes et al. 2019). We also listed the company and the kit name. Thank you so much for the advice!

Reference

Falay, M., M. Senes, S. Korkmaz, G. Zararsiz, T. Turhan, M. Okay, C. Yucel, M. F. Kilinckaya, G. Ozet and D. Yucel (2019). "Biological variation of peripheral blood T-lymphocytes." J Immunol Methods 470: 1-5.

Reviewer: 2

#### Comments to the Author

Supplementary table title could be changed from "Comparison of the levels of the percentage of leukocytes of COVID-19 pneumonia patients at admission and discharge" into "comparison of lymphocyte subsets percentage of COVID-19 pneumonia patients at admission and discharge"

Figure 1 shows two footnotes. Please delete one.

Answer:

Thank you so much for the advice! We have changed the title of supplementary table to "comparison of lymphocyte subsets percentage of COVID-19 pneumonia patients at admission and discharge". Also, we deleted one footnote in the revised manuscript. Thanks again for your valuable suggestion!
