# Supplementary material for: Dysfunction of adaptive immunity is related to severity of COVID-19: a retrospective study
Source: PubMed Central journal article supplement — Ther Adv Respir Dis. 2020 Jul 20;14:1753466620942129. doi: 10.1177/1753466620942129 (PMC7372623; doi:10.1177/1753466620942129), 2020-07-20
Supplement: Reviewer_1_v.2.pdf [file Reviewer_1_v.2.pdf]

Reviewer 1, v.2

Comments to the Author

Add to methods:

- Complete cell counts and the absolute count for platelet count, neutrophils, monocytes, lymphocytes were retrieved separately for the calculation of inflammatory index calculation of neutrophil-to-lymphocyte ratio (NLR)
- Few details about all reagents used, the company providing the kit and country method in short or add a reference
- Few details about flow cytometer reagent used, lymphocyte markers for T and B cells. The company providing the kit and country method in short or add a reference
