# Supplementary material for: Dysfunction of adaptive immunity is related to severity of COVID-19: a retrospective study
Source: PubMed Central journal article supplement — Ther Adv Respir Dis. 2020 Jul 20;14:1753466620942129. doi: 10.1177/1753466620942129 (PMC7372623; doi:10.1177/1753466620942129), 2020-07-20
Supplement: Reviewer_2_v.2.pdf [file Reviewer_2_v.2.pdf]

Reviewer 2 v.2

Comments to the Author

Supplementary table title could be changed from "Comparison of the levels of the percentage of leukocytes of COVID-19 pneumonia patients at admission and discharge" into "comparison of lymphocyte subsets percentage of COVID-19 pneumonia patients at admission and discharge"

Figure 1 shows two footnotes. Please delete one.
